# Supplementary material
Source: PubMed Central journal article supplement (PMC3700138)
Supplement: MCB.01254-12_zmb999100033so1.pdf [file MCB.01254-12_zmb999100033so1.pdf]

**A**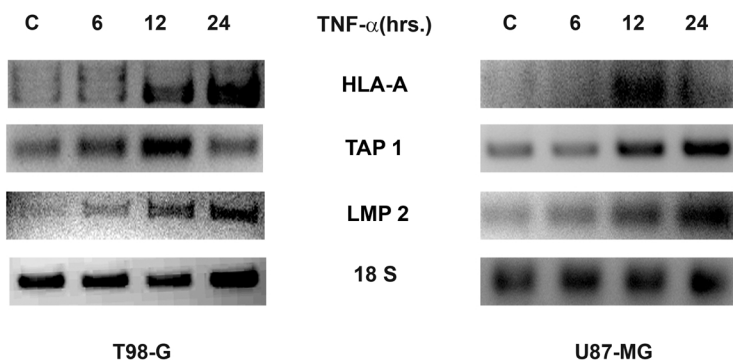**B**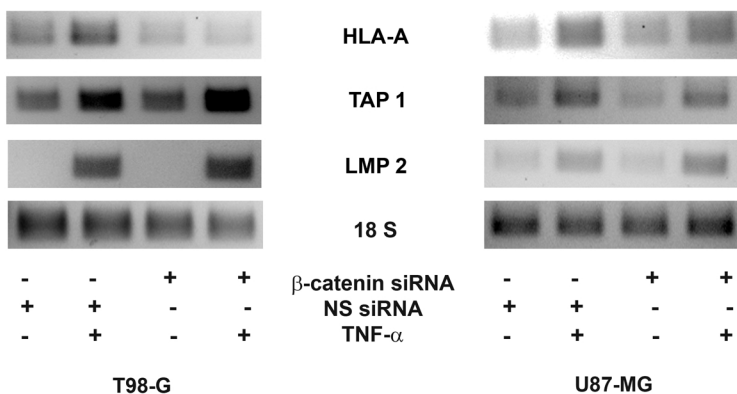

**Supplementary Figure 1.** (A) TNF $\alpha$  increases mRNA levels of MHC-I and related genes. Total RNA was isolated from TNF $\alpha$  treated cells and the mRNA levels for MHC-I heavy chain (HLA-A), TAP1, LMP2 were determined by RT-PCR. (B)  $\beta$ -catenin regulates expression of MHC-I but not related genes. Total RNA isolated from glioma cells transfected with  $\beta$ -catenin siRNA was analyzed by quantitative real-time PCR for the expression of MHC-I heavy chain (HLA-A), TAP1, LMP2 genes. Bands were normalized against 18S rRNA levels.
