# Supplementary material
Source: PubMed Central journal article supplement (PMC3700138)
Supplement: MCB.01254-12_zmb999100033so2.pdf [file MCB.01254-12_zmb999100033so2.pdf]

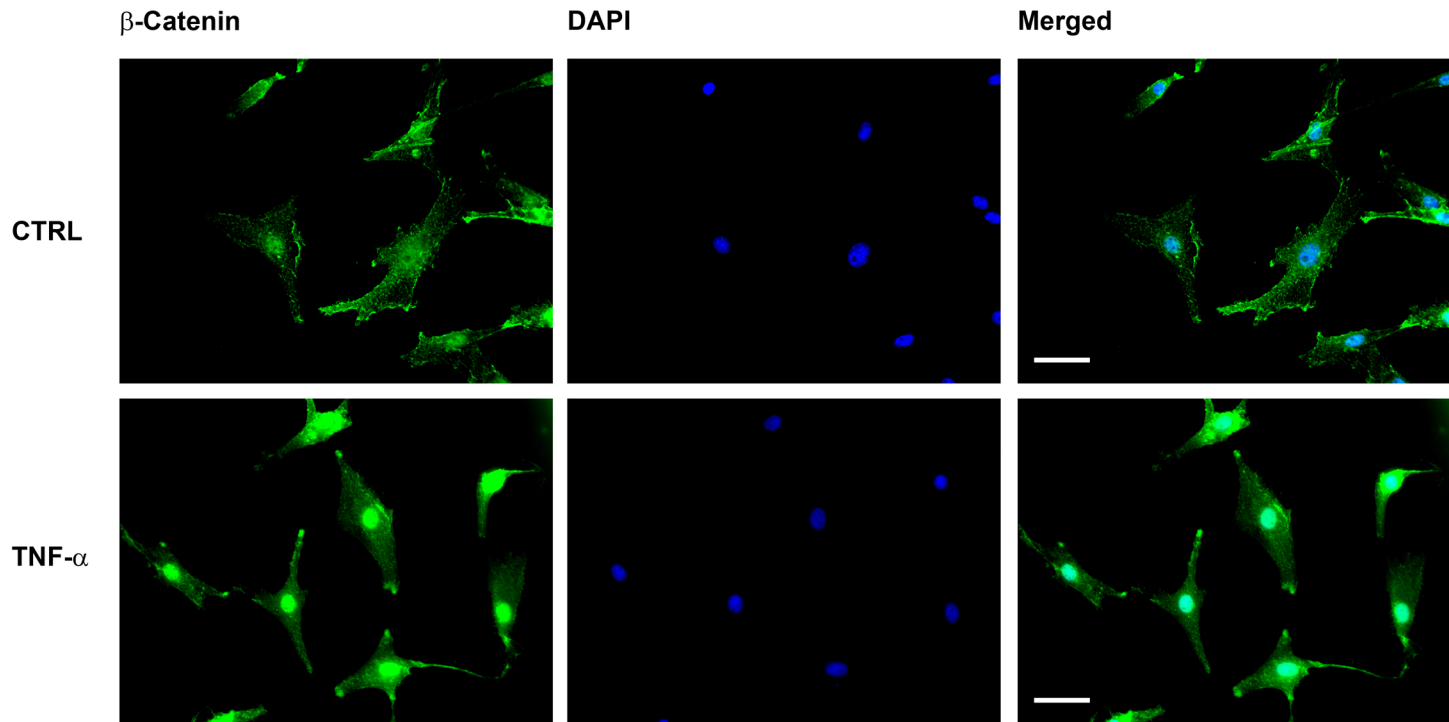

**Supplementary Figure 2:** TNF $\alpha$  increases levels of nuclear  $\beta$ -catenin as demonstrated by immunocytochemistry. TNF $\alpha$  treated cells were immunostained for  $\beta$ -catenin as described in Materials and Methods. Images were taken at 20X magnification. Scale bars indicate 20 $\mu$ m.
