# Supplementary material
Source: PubMed Central journal article supplement (PMC3700138)
Supplement: MCB.01254-12_zmb999100033so3.pdf [file MCB.01254-12_zmb999100033so3.pdf]

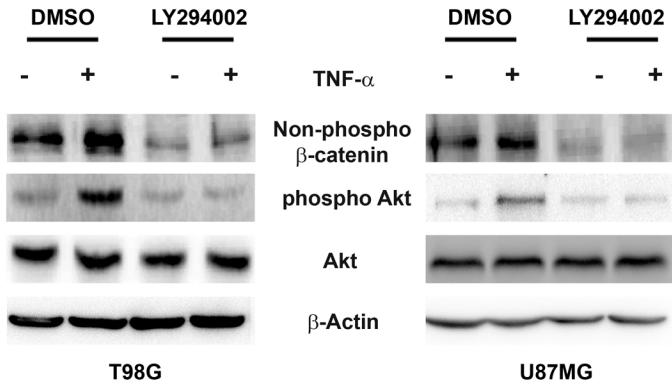

**Supplementary Figure 3.** Treatment with PI-3K/Akt inhibitor abrogates  $\beta$ -catenin activation in TNF $\alpha$  treated glioma cells. Cells were treated with TNF $\alpha$  in the presence and absence of 10  $\mu$ M of PI-3K/Akt inhibitor LY294002 for 12 hours and Western blot assay was performed to determine levels of active  $\beta$ -catenin.
